# Supplementary material
Source: Research Square preprint supplement (doi:10.21203/rs.3.rs-8888597/v1)
Supplement: Supplementary file 1 [file 253520a2708d32be23d0b78a.docx]

# Data Dictionary / Codebook

Study: *Digital-Environment–Supported Classroom Inversion: A Strategy for Developing Descriptive Writing Skills in French as a Foreign Language (FFL)***Datasets included:**

1) Raw dataset (anonymized) — long format (participant × time)
2) Processed/analytic dataset (anonymized) — wide format (participant-level) with derived variables

## General notes

• Participants are anonymized using synthetic IDs (EXP001–EXP030 for the experimental group; CTL001–CTL030 for the control group).

• No direct identifiers are included (names, student IDs, emails, phone numbers).

• Score ranges are bounded by rubric maxima: Introduction (0–8), Presentation (0–12), Descriptive devices (0–14), Conclusion (0–6), Total (0–40).

• Missing values are represented as blank/NA. No missing values were observed in the provided spreadsheets.

## A) Raw dataset (anonymized, long format)

| Variable | Type / Coding | Definition / Notes |
| --- | --- | --- |
| participant_id | string | Synthetic anonymized participant identifier (string). |
| group | categorical | Instructional condition: experimental or control (categorical). |
| time | categorical | Measurement occasion: pre or post (categorical). |
| intro | integer | Introduction sub-score (0–8). |
| presentation | integer | Presentation of aspects / organization sub-score (0–12). |
| descriptive_devices | integer | Use of descriptive devices sub-score (0–14). |
| conclusion | integer | Conclusion sub-score (0–6). |
| total | integer | Total score (0–40). |

## B) Processed/analytic dataset (anonymized, wide format)

One row per participant. Contains pre/post scores, gain scores, and Blake gain ratios computed from rubric maxima.

| Variable | Type / Formula | Definition / Notes |
| --- | --- | --- |
| participant_id | string | Synthetic anonymized participant identifier. |
| group | categorical | Instructional condition: experimental or control. |
| pre_intro | integer | Pre-test score for intro (0–8). |
| post_intro | integer | Post-test score for intro (0–8). |
| gain_intro | numeric; post_intro − pre_intro | Absolute change score. |
| blake_intro | numeric; (post_intro − pre_intro) / (8 − pre_intro) | Blake’s gain ratio (individual-level), bounded below by negative values when performance declines. |
| pre_presentation | integer | Pre-test score for presentation (0–12). |
| post_presentation | integer | Post-test score for presentation (0–12). |
| gain_presentation | numeric; post_presentation − pre_presentation | Absolute change score. |
| blake_presentation | numeric; (post_presentation − pre_presentation) / (12 − pre_presentation) | Blake’s gain ratio (individual-level), bounded below by negative values when performance declines. |
| pre_descriptive_devices | integer | Pre-test score for descriptive_devices (0–14). |
| post_descriptive_devices | integer | Post-test score for descriptive_devices (0–14). |
| gain_descriptive_devices | numeric; post_descriptive_devices − pre_descriptive_devices | Absolute change score. |
| blake_descriptive_devices | numeric; (post_descriptive_devices − pre_descriptive_devices) / (14 − pre_descriptive_devices) | Blake’s gain ratio (individual-level), bounded below by negative values when performance declines. |
| pre_conclusion | integer | Pre-test score for conclusion (0–6). |
| post_conclusion | integer | Post-test score for conclusion (0–6). |
| gain_conclusion | numeric; post_conclusion − pre_conclusion | Absolute change score. |
| blake_conclusion | numeric; (post_conclusion − pre_conclusion) / (6 − pre_conclusion) | Blake’s gain ratio (individual-level), bounded below by negative values when performance declines. |
| pre_total | integer | Pre-test score for total (0–40). |
| post_total | integer | Post-test score for total (0–40). |
| gain_total | numeric; post_total − pre_total | Absolute change score. |
| blake_total | numeric; (post_total − pre_total) / (40 − pre_total) | Blake’s gain ratio (individual-level), bounded below by negative values when performance declines. |
