# Supplementary material
Source: Research Square preprint supplement (doi:10.21203/rs.3.rs-8888597/v1)
Supplement: Supplementary file 2 [file 8fbb9c854d78672b68bcf45d.xlsx]

## Sheet: raw_long
participant_id	group	time	intro	presentation	descriptive_devices	conclusion	total
EXP001	experimental	pre	4	5	7	2	18
EXP002	experimental	pre	4	6	8	3	21
EXP003	experimental	pre	5	7	5	1	18
EXP004	experimental	pre	3	6	5	2	16
EXP005	experimental	pre	5	5	7	3	20
EXP006	experimental	pre	4	3	6	4	17
EXP007	experimental	pre	3	1	8	3	15
EXP008	experimental	pre	2	2	7	2	13
EXP009	experimental	pre	4	4	2	3	13
EXP010	experimental	pre	2	5	3	3	13
EXP011	experimental	pre	3	2	5	2	12
EXP012	experimental	pre	4	3	4	3	14
EXP013	experimental	pre	3	4	3	2	12
EXP014	experimental	pre	2	5	6	1	14
EXP015	experimental	pre	4	4	5	3	16
EXP016	experimental	pre	3	2	4	2	11
EXP017	experimental	pre	2	1	7	4	14
EXP018	experimental	pre	4	5	3	2	14
EXP019	experimental	pre	5	6	8	3	22
EXP020	experimental	pre	3	4	7	4	18
EXP021	experimental	pre	2	7	7	3	19
EXP022	experimental	pre	1	6	6	2	15
EXP023	experimental	pre	3	7	7	4	21
EXP024	experimental	pre	2	6	7	3	18
EXP025	experimental	pre	0	5	9	2	16
EXP026	experimental	pre	1	8	6	4	19
EXP027	experimental	pre	4	7	5	3	19
EXP028	experimental	pre	5	8	7	2	22
EXP029	experimental	pre	3	6	6	1	16
EXP030	experimental	pre	2	7	5	1	15
EXP001	experimental	post	6	10	8	3	27
EXP002	experimental	post	5	9	7	4	25
EXP003	experimental	post	4	6	10	3	23
EXP004	experimental	post	7	9	9	4	29
EXP005	experimental	post	6	8	9	5	28
EXP006	experimental	post	5	7	8	3	23
EXP007	experimental	post	6	6	8	2	22
EXP008	experimental	post	6	7	8	5	26
EXP009	experimental	post	6	9	7	4	26
EXP010	experimental	post	6	7	8	3	24
EXP011	experimental	post	5	6	9	4	24
EXP012	experimental	post	6	7	9	5	27
EXP013	experimental	post	5	8	8	3	24
EXP014	experimental	post	6	8	8	4	26
EXP015	experimental	post	5	7	8	3	23
EXP016	experimental	post	4	7	9	4	24
EXP017	experimental	post	5	7	8	3	23
EXP018	experimental	post	6	8	9	4	27
EXP019	experimental	post	5	7	7	2	21
EXP020	experimental	post	5	8	9	5	27
EXP021	experimental	post	4	7	8	3	22
EXP022	experimental	post	4	8	8	4	24
EXP023	experimental	post	4	7	7	4	22
EXP024	experimental	post	5	9	7	3	24
EXP025	experimental	post	4	9	9	4	26
EXP026	experimental	post	6	9	8	6	29
EXP027	experimental	post	5	6	10	4	25
EXP028	experimental	post	4	8	9	5	26
EXP029	experimental	post	3	6	9	5	23
EXP030	experimental	post	6	7	9	4	26
CTL001	control	pre	4	5	6	3	18
CTL002	control	pre	3	5	7	2	17
CTL003	control	pre	5	6	6	2	19
CTL004	control	pre	3	5	7	1	16
CTL005	control	pre	5	6	8	4	23
CTL006	control	pre	2	4	5	3	14
CTL007	control	pre	3	3	4	4	14
CTL008	control	pre	2	2	5	3	12
CTL009	control	pre	5	4	4	4	17
CTL010	control	pre	2	5	3	3	13
CTL011	control	pre	3	6	5	1	15
CTL012	control	pre	4	5	5	4	18
CTL013	control	pre	1	3	4	2	10
CTL014	control	pre	2	4	3	3	12
CTL015	control	pre	3	4	5	2	14
CTL016	control	pre	3	3	5	0	11
CTL017	control	pre	2	2	4	1	9
CTL018	control	pre	2	4	3	3	12
CTL019	control	pre	3	7	5	1	16
CTL020	control	pre	3	4	4	2	13
CTL021	control	pre	4	5	7	2	18
CTL022	control	pre	1	5	5	3	14
CTL023	control	pre	3	6	4	4	17
CTL024	control	pre	3	5	6	3	17
CTL025	control	pre	1	6	5	1	13
CTL026	control	pre	1	7	5	3	16
CTL027	control	pre	4	6	4	2	16
CTL028	control	pre	4	7	5	3	19
CTL029	control	pre	3	5	5	2	15
CTL030	control	pre	3	6	4	2	15
CTL001	control	post	5	6	8	3	22
CTL002	control	post	3	5	7	3	18
CTL003	control	post	6	7	7	4	24
CTL004	control	post	4	5	8	3	20
CTL005	control	post	6	7	8	5	26
CTL006	control	post	4	5	6	4	19
CTL007	control	post	3	6	7	4	20
CTL008	control	post	3	3	6	3	15
CTL009	control	post	5	4	4	4	17
CTL010	control	post	3	6	6	4	19
CTL011	control	post	4	6	6	3	19
CTL012	control	post	5	6	7	4	22
CTL013	control	post	3	4	5	3	15
CTL014	control	post	4	5	7	3	19
CTL015	control	post	4	5	6	3	18
CTL016	control	post	4	5	6	2	17
CTL017	control	post	3	6	6	3	18
CTL018	control	post	3	6	6	3	18
CTL019	control	post	6	7	7	3	23
CTL020	control	post	4	6	6	4	20
CTL021	control	post	4	6	8	4	22
CTL022	control	post	3	6	7	3	19
CTL023	control	post	4	6	8	4	22
CTL024	control	post	3	7	8	3	21
CTL025	control	post	3	6	8	3	20
CTL026	control	post	3	7	8	3	21
CTL027	control	post	4	6	7	3	20
CTL028	control	post	4	8	8	3	23
CTL029	control	post	4	6	7	3	20
CTL030	control	post	3	6	7	3	19
