# Supplementary material
Source: Research Square preprint supplement (doi:10.21203/rs.3.rs-8888597/v1)
Supplement: Supplementary file 3 [file af3c86067dfd314e2926b972.xlsx]

## Sheet: pre test
introduction (8)	presentation (12)	moyen (14)	conclusion (6)	la note totale (40)
4	5	7	2	18
4	6	8	3	21
5	7	5	1	18
3	6	5	2	16
5	5	7	3	20
4	3	6	4	17
3	1	8	3	15
2	2	7	2	13
4	4	2	3	13
2	5	3	3	13
3	2	5	2	12
4	3	4	3	14
3	4	3	2	12
2	5	6	1	14
4	4	5	3	16
3	2	4	2	11
2	1	7	4	14
4	5	3	2	14
5	6	8	3	22
3	4	7	4	18
2	7	7	3	19
1	6	6	2	15
3	7	7	4	21
2	6	7	3	18
0	5	9	2	16
1	8	6	4	19
4	7	5	3	19
5	8	7	2	22
3	6	6	1	16
2	7	5	1	15

## Sheet: post test
introduction (8)	presentation (12)	moyen (14)	conclusion (6)	la note totale (40)
6	10	8	3	27
5	9	7	4	25
4	6	10	3	23
7	9	9	4	29
6	8	9	5	28
5	7	8	3	23
6	6	8	2	22
6	7	8	5	26
6	9	7	4	26
6	7	8	3	24
5	6	9	4	24
6	7	9	5	27
5	8	8	3	24
6	8	8	4	26
5	7	8	3	23
4	7	9	4	24
5	7	8	3	23
6	8	9	4	27
5	7	7	2	21
5	8	9	5	27
4	7	8	3	22
4	8	8	4	24
4	7	7	4	22
5	9	7	3	24
4	9	9	4	26
6	9	8	6	29
5	6	10	4	25
4	8	9	5	26
3	6	9	5	23
6	7	9	4	26

## Sheet: hypotheses
	Il existe une différence statistiquement significative au seuil de 0.01 entre les moyennes des notes des étudiants du groupe expérimental au pré/post test de l’interaction écrite en faveur du post-test.
