# Supplementary material
Source: Research Square preprint supplement (doi:10.21203/rs.3.rs-8888597/v1)
Supplement: Supplementary file 4 [file dd1cc198d8a487ac1e874f76.xlsx]

## Sheet: processed_wide
participant_id	group	pre_intro	pre_presentation	pre_descriptive_devices	pre_conclusion	pre_total	post_intro	post_presentation	post_descriptive_devices	post_conclusion	post_total	gain_intro	blake_intro	gain_presentation	blake_presentation	gain_descriptive_devices	blake_descriptive_devices	gain_conclusion	blake_conclusion	gain_total	blake_total
EXP001	experimental	4	5	7	2	18	6	10	8	3	27	2	0.5	5	0.714286	1	0.142857	1	0.25	9	0.409091
EXP002	experimental	4	6	8	3	21	5	9	7	4	25	1	0.25	3	0.5	-1	-0.166667	1	0.333333	4	0.210526
EXP003	experimental	5	7	5	1	18	4	6	10	3	23	-1	-0.333333	-1	-0.2	5	0.555556	2	0.4	5	0.227273
EXP004	experimental	3	6	5	2	16	7	9	9	4	29	4	0.8	3	0.5	4	0.444444	2	0.5	13	0.541667
EXP005	experimental	5	5	7	3	20	6	8	9	5	28	1	0.333333	3	0.428571	2	0.285714	2	0.666667	8	0.4
EXP006	experimental	4	3	6	4	17	5	7	8	3	23	1	0.25	4	0.444444	2	0.25	-1	-0.5	6	0.26087
EXP007	experimental	3	1	8	3	15	6	6	8	2	22	3	0.6	5	0.454545	0	0	-1	-0.333333	7	0.28
EXP008	experimental	2	2	7	2	13	6	7	8	5	26	4	0.666667	5	0.5	1	0.142857	3	0.75	13	0.481481
EXP009	experimental	4	4	2	3	13	6	9	7	4	26	2	0.5	5	0.625	5	0.416667	1	0.333333	13	0.481481
EXP010	experimental	2	5	3	3	13	6	7	8	3	24	4	0.666667	2	0.285714	5	0.454545	0	0	11	0.407407
EXP011	experimental	3	2	5	2	12	5	6	9	4	24	2	0.4	4	0.4	4	0.444444	2	0.5	12	0.428571
EXP012	experimental	4	3	4	3	14	6	7	9	5	27	2	0.5	4	0.444444	5	0.5	2	0.666667	13	0.5
EXP013	experimental	3	4	3	2	12	5	8	8	3	24	2	0.4	4	0.5	5	0.454545	1	0.25	12	0.428571
EXP014	experimental	2	5	6	1	14	6	8	8	4	26	4	0.666667	3	0.428571	2	0.25	3	0.6	12	0.461538
EXP015	experimental	4	4	5	3	16	5	7	8	3	23	1	0.25	3	0.375	3	0.333333	0	0	7	0.291667
EXP016	experimental	3	2	4	2	11	4	7	9	4	24	1	0.2	5	0.5	5	0.5	2	0.5	13	0.448276
EXP017	experimental	2	1	7	4	14	5	7	8	3	23	3	0.5	6	0.545455	1	0.142857	-1	-0.5	9	0.346154
EXP018	experimental	4	5	3	2	14	6	8	9	4	27	2	0.5	3	0.428571	6	0.545455	2	0.5	13	0.5
EXP019	experimental	5	6	8	3	22	5	7	7	2	21	0	0	1	0.166667	-1	-0.166667	-1	-0.333333	-1	-0.0555556
EXP020	experimental	3	4	7	4	18	5	8	9	5	27	2	0.4	4	0.5	2	0.285714	1	0.5	9	0.409091
EXP021	experimental	2	7	7	3	19	4	7	8	3	22	2	0.333333	0	0	1	0.142857	0	0	3	0.142857
EXP022	experimental	1	6	6	2	15	4	8	8	4	24	3	0.428571	2	0.333333	2	0.25	2	0.5	9	0.36
EXP023	experimental	3	7	7	4	21	4	7	7	4	22	1	0.2	0	0	0	0	0	0	1	0.0526316
EXP024	experimental	2	6	7	3	18	5	9	7	3	24	3	0.5	3	0.5	0	0	0	0	6	0.272727
EXP025	experimental	0	5	9	2	16	4	9	9	4	26	4	0.5	4	0.571429	0	0	2	0.5	10	0.416667
EXP026	experimental	1	8	6	4	19	6	9	8	6	29	5	0.714286	1	0.25	2	0.25	2	1	10	0.47619
EXP027	experimental	4	7	5	3	19	5	6	10	4	25	1	0.25	-1	-0.2	5	0.555556	1	0.333333	6	0.285714
EXP028	experimental	5	8	7	2	22	4	8	9	5	26	-1	-0.333333	0	0	2	0.285714	3	0.75	4	0.222222
EXP029	experimental	3	6	6	1	16	3	6	9	5	23	0	0	0	0	3	0.375	4	0.8	7	0.291667
EXP030	experimental	2	7	5	1	15	6	7	9	4	26	4	0.666667	0	0	4	0.444444	3	0.6	11	0.44
CTL001	control	4	5	6	3	18	5	6	8	3	22	1	0.25	1	0.142857	2	0.25	0	0	4	0.181818
CTL002	control	3	5	7	2	17	3	5	7	3	18	0	0	0	0	0	0	1	0.25	1	0.0434783
CTL003	control	5	6	6	2	19	6	7	7	4	24	1	0.333333	1	0.166667	1	0.125	2	0.5	5	0.238095
CTL004	control	3	5	7	1	16	4	5	8	3	20	1	0.2	0	0	1	0.142857	2	0.4	4	0.166667
CTL005	control	5	6	8	4	23	6	7	8	5	26	1	0.333333	1	0.166667	0	0	1	0.5	3	0.176471
CTL006	control	2	4	5	3	14	4	5	6	4	19	2	0.333333	1	0.125	1	0.111111	1	0.333333	5	0.192308
CTL007	control	3	3	4	4	14	3	6	7	4	20	0	0	3	0.333333	3	0.3	0	0	6	0.230769
CTL008	control	2	2	5	3	12	3	3	6	3	15	1	0.166667	1	0.1	1	0.111111	0	0	3	0.107143
CTL009	control	5	4	4	4	17	5	4	4	4	17	0	0	0	0	0	0	0	0	0	0
CTL010	control	2	5	3	3	13	3	6	6	4	19	1	0.166667	1	0.142857	3	0.272727	1	0.333333	6	0.222222
CTL011	control	3	6	5	1	15	4	6	6	3	19	1	0.2	0	0	1	0.111111	2	0.4	4	0.16
CTL012	control	4	5	5	4	18	5	6	7	4	22	1	0.25	1	0.142857	2	0.222222	0	0	4	0.181818
CTL013	control	1	3	4	2	10	3	4	5	3	15	2	0.285714	1	0.111111	1	0.1	1	0.25	5	0.166667
CTL014	control	2	4	3	3	12	4	5	7	3	19	2	0.333333	1	0.125	4	0.363636	0	0	7	0.25
CTL015	control	3	4	5	2	14	4	5	6	3	18	1	0.2	1	0.125	1	0.111111	1	0.25	4	0.153846
CTL016	control	3	3	5	0	11	4	5	6	2	17	1	0.2	2	0.222222	1	0.111111	2	0.333333	6	0.206897
CTL017	control	2	2	4	1	9	3	6	6	3	18	1	0.166667	4	0.4	2	0.2	2	0.4	9	0.290323
CTL018	control	2	4	3	3	12	3	6	6	3	18	1	0.166667	2	0.25	3	0.272727	0	0	6	0.214286
CTL019	control	3	7	5	1	16	6	7	7	3	23	3	0.6	0	0	2	0.222222	2	0.4	7	0.291667
CTL020	control	3	4	4	2	13	4	6	6	4	20	1	0.2	2	0.25	2	0.2	2	0.5	7	0.259259
CTL021	control	4	5	7	2	18	4	6	8	4	22	0	0	1	0.142857	1	0.142857	2	0.5	4	0.181818
CTL022	control	1	5	5	3	14	3	6	7	3	19	2	0.285714	1	0.142857	2	0.222222	0	0	5	0.192308
CTL023	control	3	6	4	4	17	4	6	8	4	22	1	0.2	0	0	4	0.4	0	0	5	0.217391
CTL024	control	3	5	6	3	17	3	7	8	3	21	0	0	2	0.285714	2	0.25	0	0	4	0.173913
CTL025	control	1	6	5	1	13	3	6	8	3	20	2	0.285714	0	0	3	0.333333	2	0.4	7	0.259259
CTL026	control	1	7	5	3	16	3	7	8	3	21	2	0.285714	0	0	3	0.333333	0	0	5	0.208333
CTL027	control	4	6	4	2	16	4	6	7	3	20	0	0	0	0	3	0.3	1	0.25	4	0.166667
CTL028	control	4	7	5	3	19	4	8	8	3	23	0	0	1	0.2	3	0.333333	0	0	4	0.190476
CTL029	control	3	5	5	2	15	4	6	7	3	20	1	0.2	1	0.142857	2	0.222222	1	0.25	5	0.2
CTL030	control	3	6	4	2	15	3	6	7	3	19	0	0	0	0	3	0.3	1	0.25	4	0.16
