# Supplementary material
Source: Research Square preprint supplement (doi:10.21203/rs.3.rs-8888597/v1)
Supplement: Supplementary file 5 [file f5e05a721abc8faeab7ba19c.xlsx]

## Sheet: pre test
introduction (8)	presentation (12)	moyen (14)	conclusion (6)	la note totale (40)
4	5	6	3	18
3	5	7	2	17
5	6	6	2	19
3	5	7	1	16
5	6	8	4	23
2	4	5	3	14
3	3	4	4	14
2	2	5	3	12
5	4	4	4	17
2	5	3	3	13
3	6	5	1	15
4	5	5	4	18
1	3	4	2	10
2	4	3	3	12
3	4	5	2	14
3	3	5	0	11
2	2	4	1	9
2	4	3	3	12
3	7	5	1	16
3	4	4	2	13
4	5	7	2	18
1	5	5	3	14
3	6	4	4	17
3	5	6	3	17
1	6	5	1	13
1	7	5	3	16
4	6	4	2	16
4	7	5	3	19
3	5	5	2	15
3	6	4	2	15

## Sheet: post test
introduction (8)	presentation (12)	moyen (14)	conclusion (6)	la note totale (40)
5	6	8	3	22
3	5	7	3	18
6	7	7	4	24
4	5	8	3	20
6	7	8	5	26
4	5	6	4	19
3	6	7	4	20
3	3	6	3	15
5	4	4	4	17
3	6	6	4	19
4	6	6	3	19
5	6	7	4	22
3	4	5	3	15
4	5	7	3	19
4	5	6	3	18
4	5	6	2	17
3	6	6	3	18
3	6	6	3	18
6	7	7	3	23
4	6	6	4	20
4	6	8	4	22
3	6	7	3	19
4	6	8	4	22
3	7	8	3	21
3	6	8	3	20
3	7	8	3	21
4	6	7	3	20
4	8	8	3	23
4	6	7	3	20
3	6	7	3	19

## Sheet: hypotheses
	Il existe une différence statistiquement significative au seuil de 0.01 entre les moyennes des notes des étudiants du groupe expérimental au pré/post test de l’interaction écrite en faveur du post-test.
